# Supplementary material for: A spatial model of the plant circadian clock reveals design principles for coordinated timing
Source: PubMed Central journal article supplement (PMC8935279; doi:10.15252/msb.202010140), 2022-03-21
Supplement: MSB-18-e10140-s004.pdf [file MSB-18-e10140-s004.pdf]

## Expanded View Figures

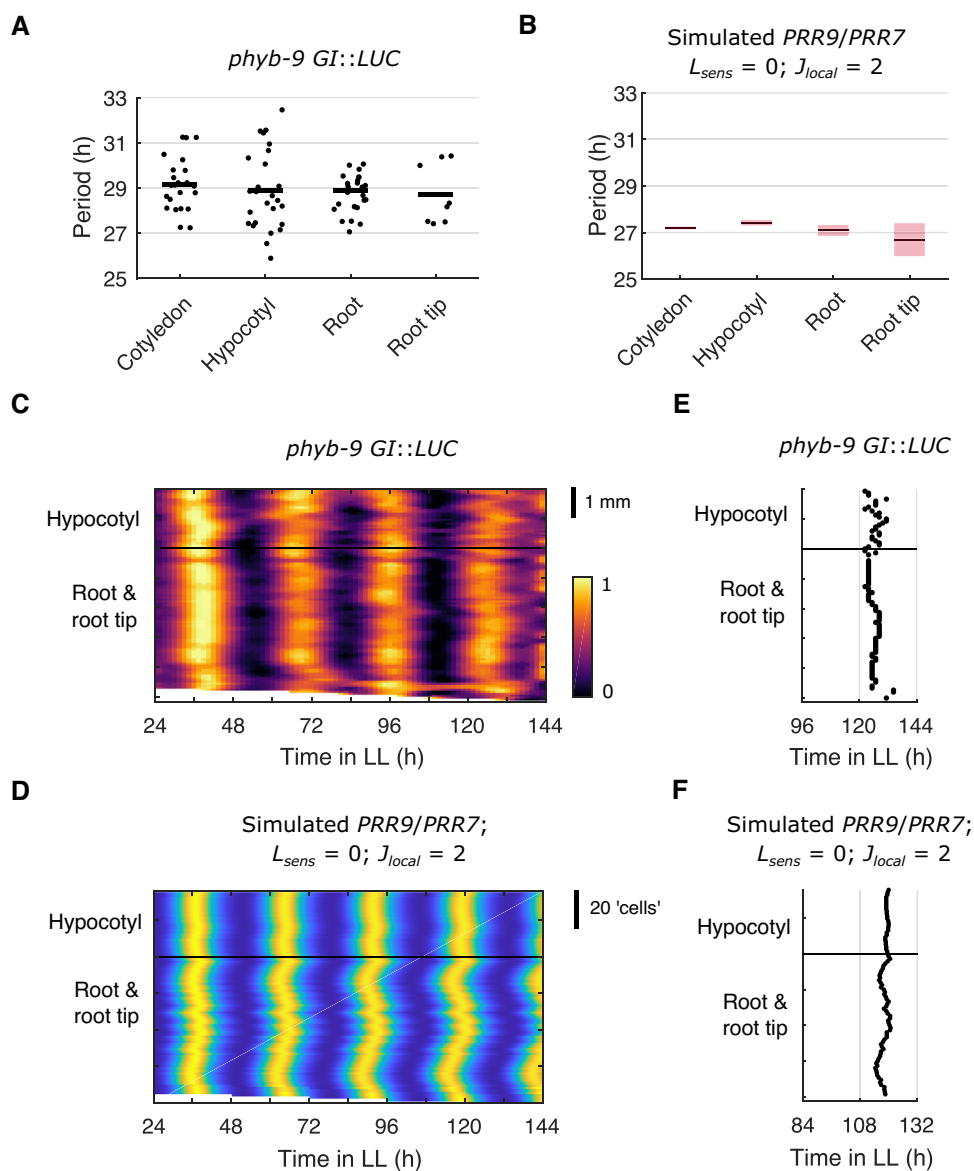

**Figure EV1. Simulations with zero light input capture the loss of period differences observed in the *phyb-9* mutant.**

- A Period estimates of *GI::LUC* expression measured from different organs under red light in the light-sensing mutant *phyb-9* genetic background. Each data point represents a period estimate from the organ of a single seedling and the horizontal black line shows the mean.
- B Period estimates of simulated *PRR9/PRR7* expression, measured from regions within the template seedling. Simulations were performed with zero light sensitivity for all cells ( $L_{sens} = 0; D = 1$ ) and with local cell-to-cell coupling ( $J_{local} = 2$ ). The horizontal black line shows the mean and the red shaded area one SD of 9 simulations.
- C Representative intensity plot of *GI::LUC* expression across longitudinal sections of a single seedling under constant red light. Imaging was performed under red light in the light-sensing mutant *phyb-9* genetic background.
- D Representative intensity plot of simulated *PRR9/PRR7* expression across longitudinal sections of a single seedling under LL. Simulations were performed with zero light sensitivity for all cells ( $L_{sens} = 0; D = 1$ ) and with local cell-to-cell coupling ( $J_{local} = 2$ ).
- E, F Times of the final peaks of *GI::LUC* intensity plot (E) or simulated *PRR9/PRR7* expression (F). Simulations were performed with zero light sensitivity for all cells ( $L_{sens} = 0; D = 1$ ) and with local cell-to-cell coupling ( $J_{local} = 2$ ).

Data information: Experimental data is an analysis of *Arabidopsis* time-lapse movies carried out previously (Greenwood et al, 2019).  $N = 2$  and  $n = 8-23$ , where  $N$  represents the number of independent experiments and  $n$  the total number of organs tracked.

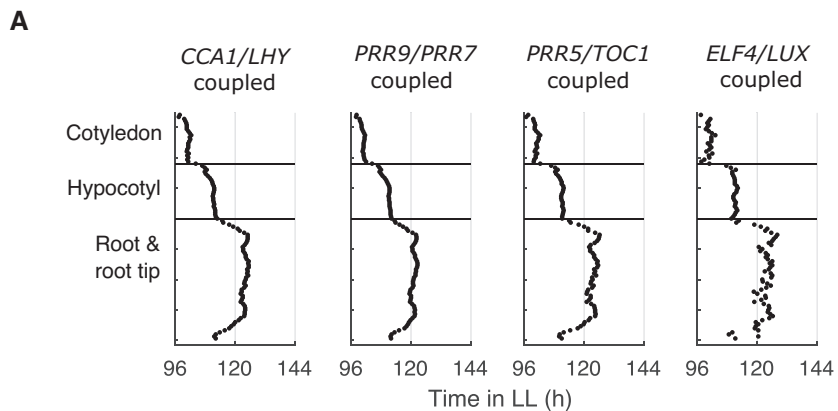

**Figure EV2. Peaks of simulated expression with the local sharing of different clock molecules between cells.**

A, B The times of the final peaks of simulated *PRR9/PRR7* intensity plots, simulated with the sharing of *CCA1/LHY*, *PRR9/PRR7*, *PRR5/TOC1*, or *ELF4/LUX* mRNA (A) or protein (B) locally between neighbor cells. Simulations were performed under LL with local cell-to-cell coupling ( $J_{local} = 2$ ).

Data information: Data in (A) ("*CCA1/LHY* coupled") is replotted from Fig 3D and data in (B) ("*ELF4/LUX* coupled") is replotted from Fig 4B.

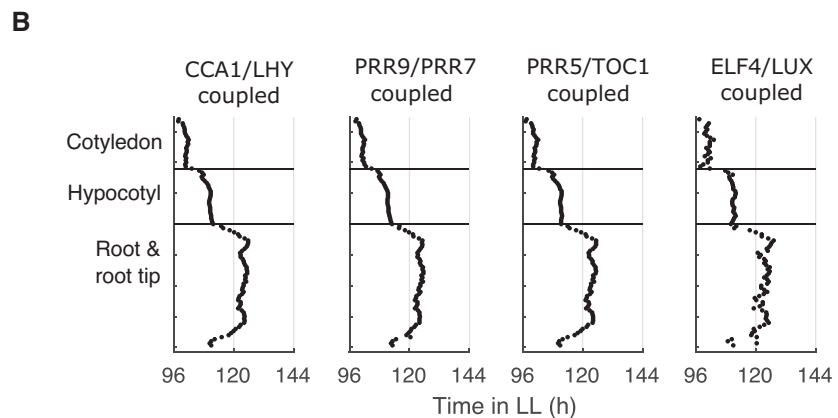

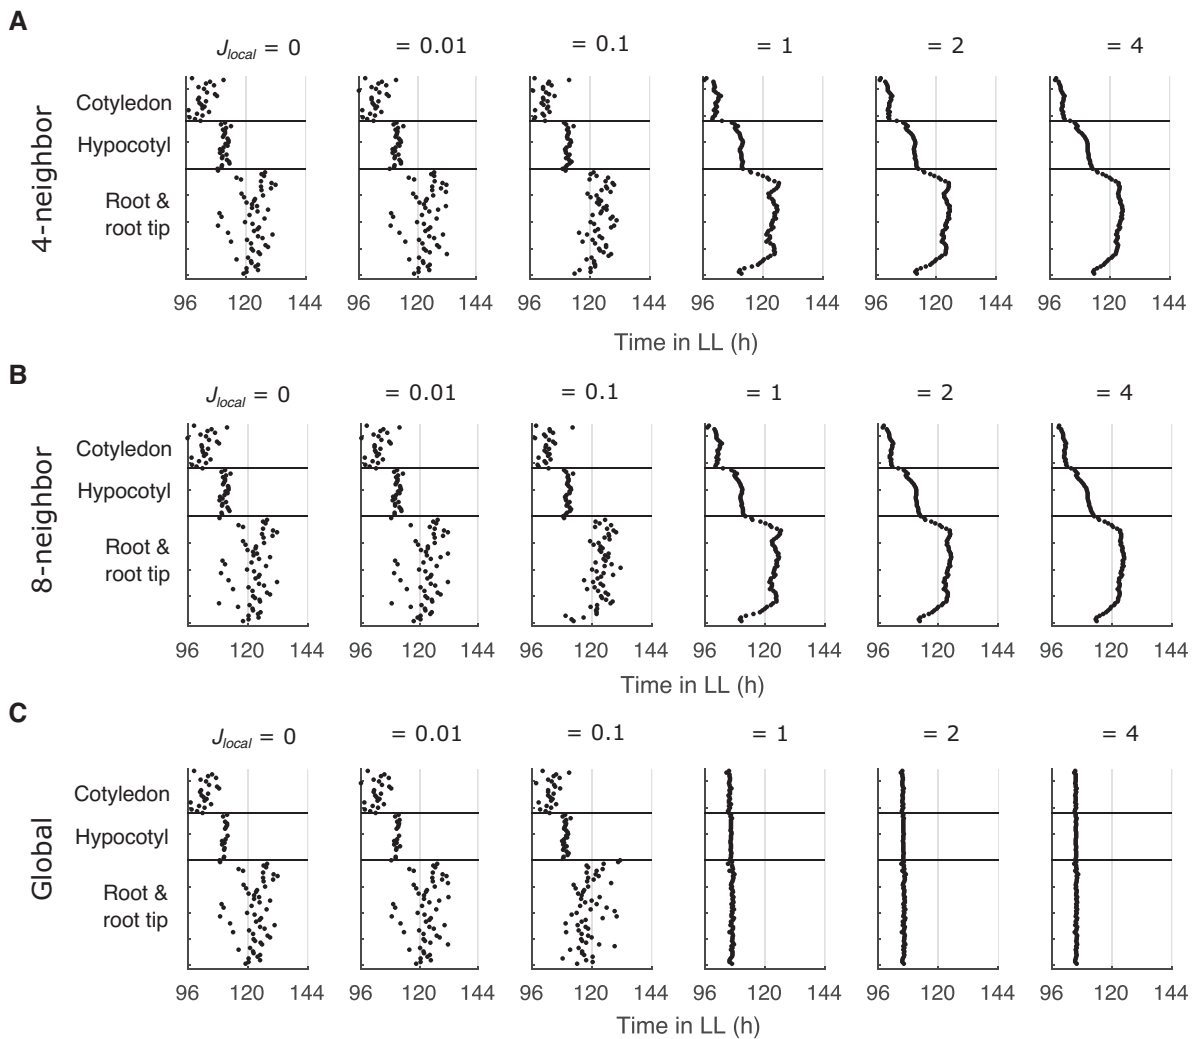

**Figure EV3. Peaks of simulated expression under LL with different coupling rules.**

A–C The times of the final peaks of simulated *PRR9/PRR7* intensity plots, simulated under LL with increasing strengths of local cell-to-cell coupling between the 4 nearest neighbor cells (A), 8 nearest neighbor cells (B), or globally (all-to-all; C).

Data information: (A) is replotted from Fig 3E.

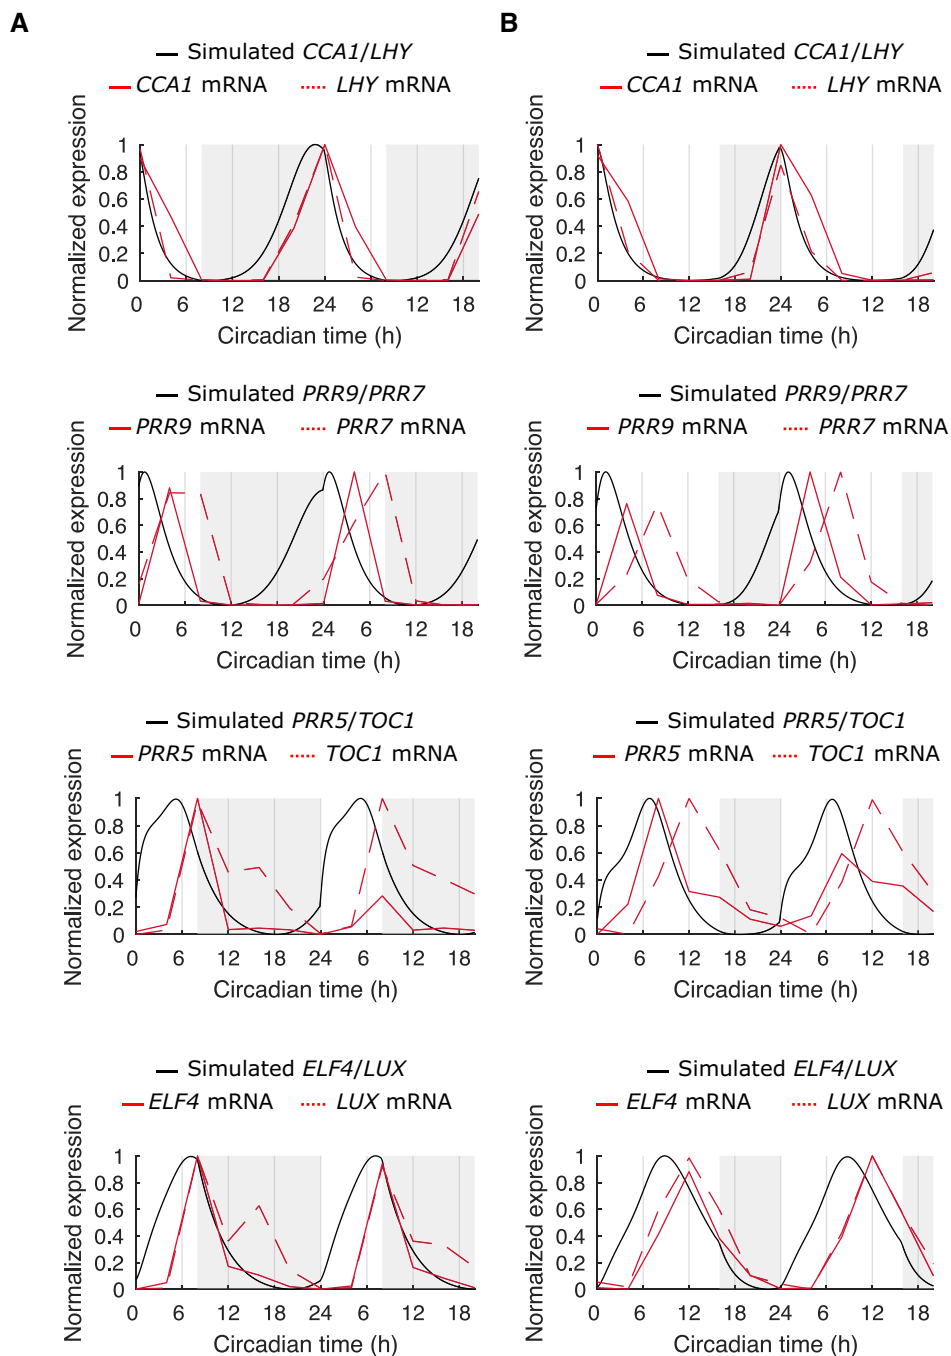

**Figure EV4. Simulations under short- and long-day lengths approximate experimental data.**

A, B Simulated (black line) and experimental (red line) expression of clock genes under idealized LD cycles with 8 h (A) or 16 h (B) day lengths. Simulations were implemented as a single cell, without variation in gene expression, and with  $L_{sens} = 1$ .

Data information: Experimental data are *Arabidopsis* whole-plant averages obtained from the DIURNAL database (Mockler et al, 2007).
